# Supplementary material
Source: publisher figshare collection journal article supplement (https://tandf.figshare.com/ndownloader/files/9918412)
Supplement: Supplementary file [file 9918412]

## Supporting Information

**Radical Polymerization Approach for Ring Opened Norbornene Anhydride Based Macromonomers**

Ravichandran H. Kollarigowda<sup>a\*</sup> and Pankaj Thakur<sup>b</sup>

<sup>a</sup> *Department of Chemical and Materials Engineering, University of Alberta, 9211 - 116 Street, Edmonton, Alberta, CANADA, T6G 1H9.*

<sup>b</sup> *Department of Chemistry Solan-Oachghat-Kumarhatti Highway, Bajol, Solan, Himachal Pradesh 173229, India.*

[\\*kollarig@ualberta.ca](mailto:kollarig@ualberta.ca), [ravichandran.hk@gmail.com](mailto:ravichandran.hk@gmail.com)

| Name                                                                            | Page number |
|---------------------------------------------------------------------------------|-------------|
| Synthesis of Monomer a                                                          | 2           |
| NMR of monomer a Figure S1                                                      | 3           |
| <sup>1</sup> HNMR spectra monomer a and homopolymer spectra of Poly1a Figure S2 | 4           |
| GPC calibration curve Figure S3.                                                | 5           |
| Synthesis of Poly 2a (RFAT polymerization)                                      | 5           |

## Experimental condition.

**Materials.** All the raw materials were purchased from Sigma-Aldrich. All solvents were purchased from Sigma-Aldrich and used as received.

**Synthesis monomer i.** Compounds was prepared according to the procedures reported in the literature.<sup>1,2</sup> The monoester of the malonic acid was obtained according to our previously reported procedure.<sup>3</sup>

Cyclopentadiene was previously prepared through the cracking of dicyclopentadiene and kept under cold conditions. In a 25 mL Erlenmeyer flask, maleic anhydride (1.02 g, 10.4 mmol) and ethyl acetate (4.0 mL) were combined, swirled, and slightly heated until completely dissolved. To the mixture, ligroin (4 mL) was added and mixed thoroughly until dissolved. Finally, cyclopentadiene (1 mL, 11.9 mmol) was added to the mixture and mixed extensively. The reaction was cooled to room temperature and placed into an ice bath until crystallized. The crystals were isolated through filtration in a Hirsch funnel. The product had the following properties: 0.47 g (27.6% yield) mp: 163-164 °C (lit: 164 °C). <sup>1</sup>H NMR (CDCl<sub>3</sub>, 300 MHz)  $\delta$ : 6.30 (dd, J=1.8 Hz, 2H), 3.57 (dd, J=7.0 Hz, 2H), 3.45 (m, 2H), 1.78 (dt, J=9.0,1.8 Hz, 1H), 1.59 (m, 1H) ppm. <sup>13</sup>C NMR (CDCl<sub>3</sub>, 75Hz)  $\delta$ : 171.3, 135.5, 52.7, 47.1, 46.1 ppm.

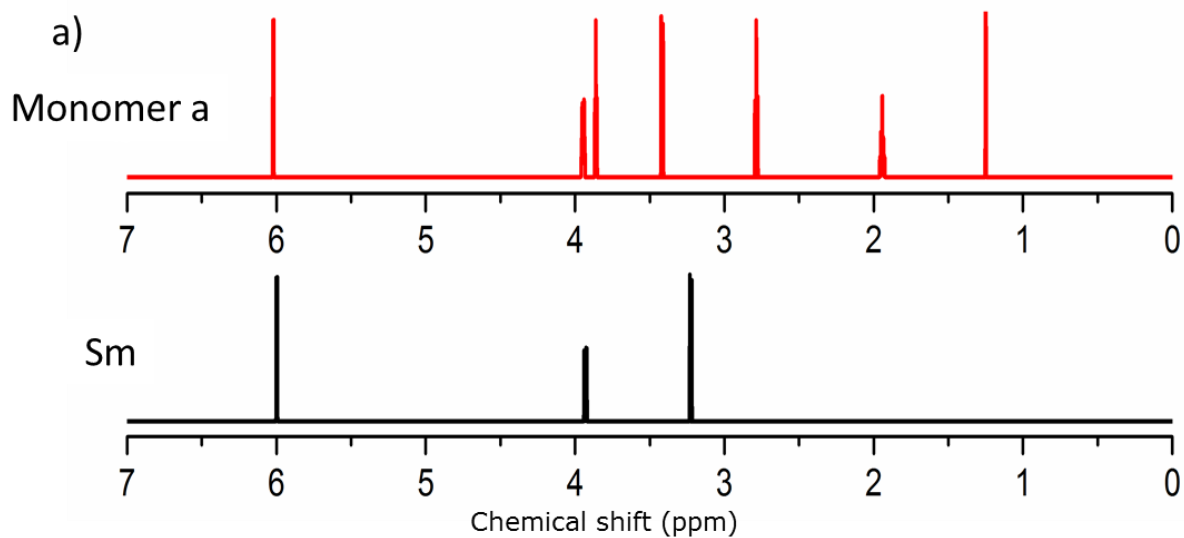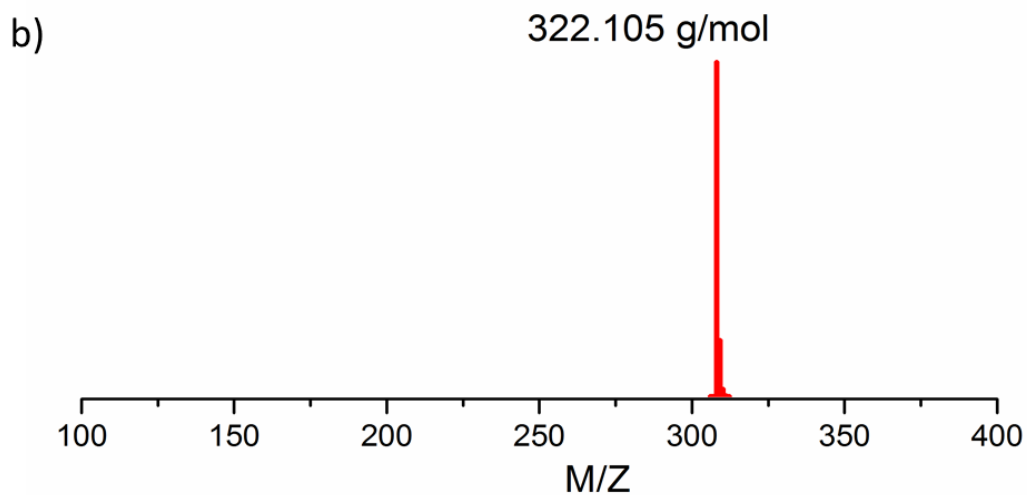

**Figure S1.**  $^1\text{H}$ NMR spectra of synthesized monomer ii (a) and mass spectra of monomer a (b).

NMR spectra were recorded on a Varian (300 MHz) NMR Spectrometer in DMSO- $d_6$ .

**Ring opening metathesis polymerization of dimethyl-7-oxabicyclo [2.2.1] hept-5-ene exo 2,3dicarboxylate.**

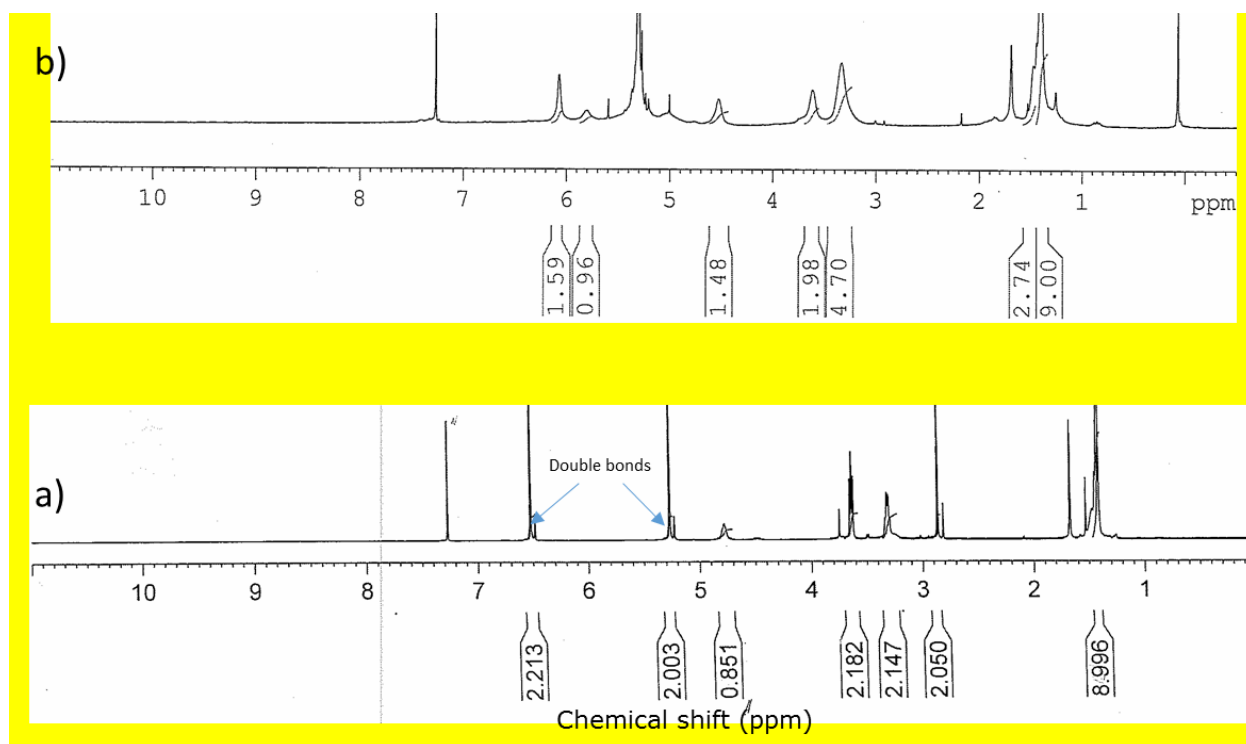

**Figure S2.**  $^1\text{H}$ NMR spectra monomer a (bottom) and homopolymer spectra of Poly1a. NMR spectra were recorded on a Varian (600 MHz) NMR Spectrometer in deuterated chloroform.

**Gel permeation chromatography.** GPC analysis was done on polymer samples using THF on a 3 $\mu\text{m}$  SEC 200 (300 x 7.8 mm) column and an ELS detector. A flow rate of 1 ml/minute and a pressure of 60 PSI were used. Five poly(styrene) (Sigma-Aldrich) were used for calibration.

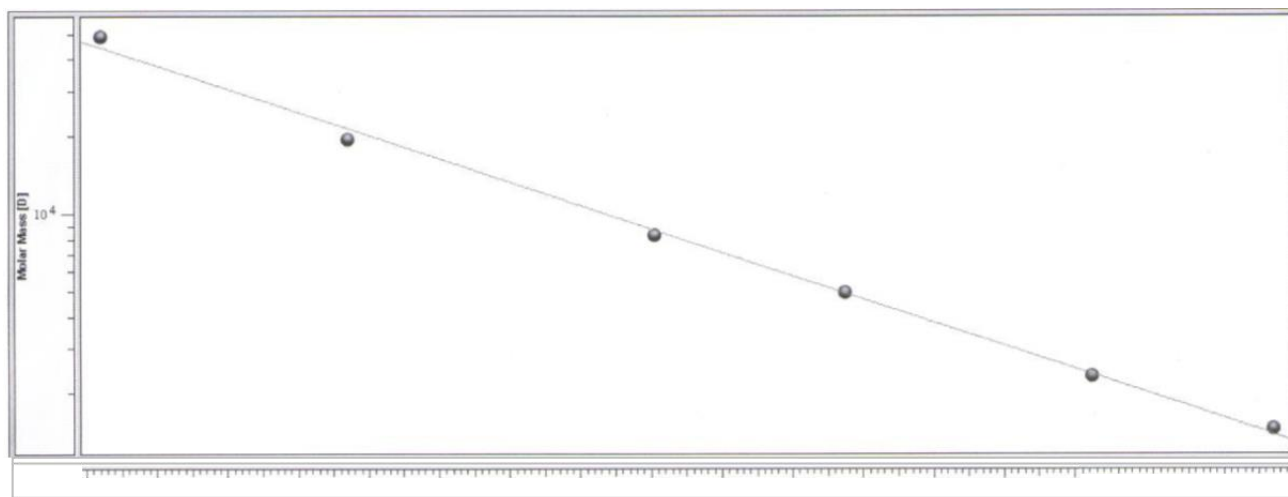

| Elution Volume (ml) | Molar mass (D) |
|---------------------|----------------|
| 6.16552             | 500000         |
| 7.0345              | 198880         |
| 7.576               | 101000         |
| 8.2747              | 89620          |
| 8.7913              | 50000          |
| 9.5236              | 15000          |

**Figure S3.** Graph of retention time versus estimated molecular weight. Red squares refer to commercially available poly(styrene)..

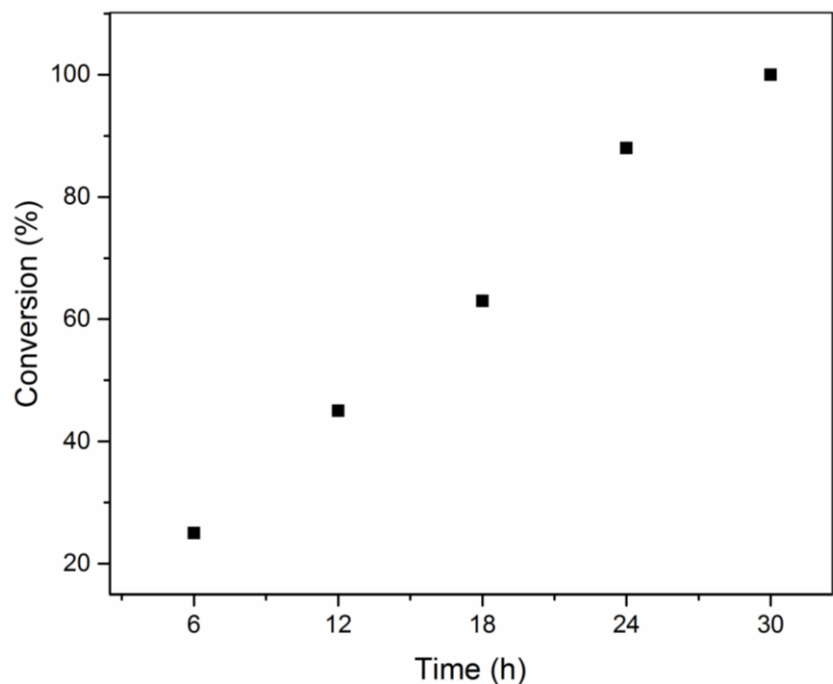

**Figure S4.** Graph of RAFT polymerization conversion table of macromonomer of Poly 2b and Poly2c.

**AFM technique.** AFM measurements was characterized on substrates with a JPK AFM Nanowizard. Commercial tips (Bruker) with a resonance frequency of 50 kHz and a spring constant of 0.10 N/m, were used to scan in contact mode all over the samples.
